# Supplementary material for: A metabolic profile of all-cause mortality risk identified in an observational study of 44,168 individuals
Source: PubMed Central journal article supplement (PMC6702196; doi:10.1038/s41467-019-11311-9), 2019-08-20
Supplement: 41467_2019_11311_MOESM3_ESM.pdf [file 41467_2019_11311_MOESM3_ESM.pdf]

## Description of Additional Supplementary Files

**File name:** Supplementary Data 1

**Description:** Association of metabolic biomarkers with all-cause mortality.

**File name:** Supplementary Data 2

**Description:** Description of NMR-measured metabolic biomarkers included in this study.

**File name:** Supplementary Data 3

**Description:** Association of metabolic biomarkers with all-cause mortality, stratified by sex.

**File name:** Supplementary Data 4

**Description:** Age-stratified association of metabolic biomarkers with all-cause mortality.

**File name:** Supplementary Data 5

**Description:** Script used for the scaling of the metabolic biomarkers of the Alpha Omega Cohort.

**File name:** Supplementary Data 6

**Description:** Script used for analyses of the Alpha Omega Cohort.

**File name:** Supplementary Data 7

**Description:** Script used for the meta-analyses.
